# Supplementary material for: Carinacuma umesi, a new genus and species of bodotriid cumacean (Crustacea: Malacostraca: Peracarida) from shallow waters of the Maryland Coastal Bays, Mid-Atlantic region, USA
Source: PeerJ. 2021 Aug 24;9:e11740. doi: 10.7717/peerj.11740 (PMC8395576; doi:10.7717/peerj.11740)
Supplement: Supplemental Information 1 [file peerj-09-11740-s001.xlsx]

## Sheet: Sheet1
Station	Month	Year	Family	Subfamily	Genus	Species	Depth (m)	Temperature (°C)	pH	Salinity (PSU)	Dissolved Oxygen (mg/L)	Organic matter (%)	Sediment type	Sediment sorting	Coordinates WGS84		Remarks
															Lat	Long
8	August	2014	Bodotriidae	Vaunthompsoniinae	Carinacuma	umesi	0.8	*	*	*	*	*	*	*	38º 16.825'N	75º 08.032'W	Ovigerous female (Paratype)
15	August	2017	Bodotriidae	Vaunthompsoniinae	Carinacuma	umesi	2.8	25.5	7.6	30.9	7.1	0.44	Fine sand	Very well sorted	38º 20.398'N	75º 05.290'W	Ovigerous female (Dissected)
15	August	2018	Bodotriidae	Vaunthompsoniinae	Carinacuma	umesi	2.6	24.8	7.8	32.8	5.8	0.4	Fine sand	Very well sorted	38º 20.398'N	75º 05.290'W	Ovigerous female (Holotype)
15	August	2018	Bodotriidae	Vaunthompsoniinae	Carinacuma	umesi	2.6	24.8	7.8	32.8	5.8	0.44	Fine sand	Very well sorted	38º 20.398'N	75º 05.290'W	Non-ovigerous female (Paratype)
15	August	2018	Bodotriidae	Vaunthompsoniinae	Carinacuma	umesi	2.6	24.8	7.8	32.8	5.8	0.44	Fine sand	Very well sorted	38º 20.398'N	75º 05.290'W	Adult male (Paratype)
* No data were collected
